1

2

3

4

5

6 Selection and characterization of a reovirus mutant with improved thermostability

7

8

9

10 Anthony J. Snyder<sup>a</sup> and Pranav Danthi<sup>a#</sup>

11 <sup>a</sup>Department of Biology, Indiana University, Bloomington, Indiana, USA

12

13

14

15 Running title:  $\sigma 3$  S344P alters properties of the reovirus capsid

16

17

18

19

20

21 <sup>#</sup>Corresponding author: Mailing address: Department of Biology, Indiana University,

22 212 S. Hawthorne Drive, Bloomington, IN 47405. Phone: (812) 856-2449. Fax: (812)

23 856-5710. E-mail: pdanthi@indiana.edu

24 **ABSTRACT**

25 The environment represents a significant barrier to infection. Physical stressors (heat)  
26 or chemical agents (ethanol and sodium dodecyl sulfate) can render virions  
27 noninfectious. As such, discrete proteins are necessary to stabilize the dual layered  
28 structure of mammalian orthoreovirus (reovirus). The outer capsid participates in cell  
29 entry: (i)  $\sigma 3$  is degraded to generate the infectious subviral particle and (ii)  $\mu 1$  facilitates  
30 membrane penetration and subsequent core delivery.  $\mu 1$ - $\sigma 3$  interactions also prevent  
31 inactivation; however, this activity is not fully characterized. Using forward and reverse  
32 genetic approaches, we identified two mutations ( $\mu 1$  M258I and  $\sigma 3$  S344P) within heat  
33 resistant strains.  $\sigma 3$  S344P was sufficient to enhance capsid integrity and to reduce  
34 protease sensitivity. Moreover, these changes impaired replicative fitness in a  
35 reassortant background. This work reveals new details regarding the determinants of  
36 reovirus stability.

37

38

39

40

41

42

43

44

45

46

47 **SIGNIFICANCE**

48 Nonenveloped viruses rely on protein-protein interactions to shield their genomes from  
49 the environment. The capsid, or protective shell, must also disassemble during cell  
50 entry. In this work, we identified a determinant within mammalian orthoreovirus that  
51 regulates heat resistance, disassembly kinetics, and replicative fitness. Together,  
52 capsid function is balanced for optimal replication and for spread to a new host.

53

54

55

56

57

58

59

60

61

62

63

64

65

66

67

68

69

## 70 INTRODUCTION

71 Mammalian orthoreovirus (reovirus) is a versatile system to explore the properties of  
72 dual layered structures (1). Reovirus is composed of two concentric, protein shells (2).  
73 Each component serves a structural and/or functional role in the replication cycle. The  
74 inner capsid (core) encapsidates 10 segments of genomic dsRNA (1) and supports  
75 polymerase activity during infection (3-5). The core is highly stable, presumably to  
76 shield the viral genome from host sensors (6). The outer capsid comprises 200  $\mu$ 1- $\sigma$ 3  
77 heterohexamers and a maximum of 12  $\sigma$ 1 trimers (2, 7) and is required for cell entry (1).  
78 Virions are differentially sensitive to inactivating agents;  $\mu$ 1 adopts an altered  
79 conformation at elevated temperatures (6).

80 Reovirus initiates infection by attaching to proteinaceous receptors (8-10) or  
81 serotype-specific glycans (11-14). Virions are internalized by receptor-mediated  
82 endocytosis (15-18) and traffic to late endosomes (19-23). Acid dependent cathepsin  
83 proteases degrade  $\sigma$ 3 (24-28) and cleave  $\mu$ 1 into  $\mu$ 1 $\delta$  and  $\Phi$  (Fig. 2A) (29). The  
84 resulting intermediate is called the infectious subviral particle (30). Proteolytic  
85 disassembly (virion-to-ISVP conversion) is recapitulated *in vitro* by treating purified  
86 virions with exogenous protease (29-31). During subsequent rearrangements (ISVP-to-  
87 ISVP\* conversion), neighboring  $\mu$ 1 trimers separate (7, 32) and  $\mu$ 1 $\delta$  is cleaved into  $\mu$ 1N  
88 and  $\delta$  (Fig. 2A) (33, 34). The  $\delta$  fragment then adopts a hydrophobic and protease  
89 sensitive conformation (35). This step is accompanied by the release of  $\mu$ 1N and  $\Phi$   
90 pore forming peptides, which disrupt the endosomal membrane (33-40). ISVP-to-ISVP\*  
91 conversion can be triggered *in vitro* using heat (35, 41).

92 Reovirus must remain environmentally stable prior to infection. Heat or chemical  
93 agents render particles noninfectious (42, 43). Nonetheless, rare subpopulations harbor  
94 resistance-granting mutations, likely due to error prone replication. Studies of such  
95 variants provide clues regarding capsid stability and/or structure. When comparing  
96 prototype strains, differences in the efficiency of inactivation map to either the M2 gene  
97 segment (encodes for  $\mu 1$ ) or the S4 gene segment (encodes for  $\sigma 3$ ) (35, 41, 43).  $\mu 1$   
98 mutations were selected by exposing virions to ethanol or by exposing ISVPs to heat.  
99 These changes reveal important  $\mu 1$  mediated intratrimer, intertrimer, and trimer-core  
100 contacts (44-47). Similarly,  $\sigma 3$  Y354H was selected from persistently infected cells.  
101 This change alters capsid properties and allows for disassembly under limiting  
102 cathepsin activity (48, 49).  $\sigma 3$  also represents the primary determinant for virion  
103 thermostability (43).  $\mu 1$ - $\sigma 3$  interactions are thought to prevent irreversible and  
104 premature, entry related conformational changes (6); however, this idea has not been  
105 fully investigated. In this work, we selected for and characterized heat resistant (HR)  
106 strains: (i)  $\mu 1$  M258I and  $\sigma 3$  S344P were identified within HR strains, (ii)  $\sigma 3$  S344P was  
107 sufficient to enhance capsid integrity and to reduce protease sensitivity, and (iii) HR  
108 mutations impaired replicative fitness in a reassortant background.

109

110

## 111 **MATERIALS AND METHODS**

112 **Cells and viruses.** Murine L929 (L) cells were grown at 37°C in Joklik's minimal  
113 essential medium (Lonza) supplemented with 5% fetal bovine serum (Life  
114 Technologies), 2 mM L-glutamine (Invitrogen), 100 U/ml penicillin (Invitrogen), 100

115  $\mu\text{g/ml}$  streptomycin (Invitrogen), and 25 ng/ml amphotericin B (Sigma-Aldrich). All  
116 viruses used in this study were derived from reovirus type 1 Lang (T1L) and reovirus  
117 type 3 Dearing (T3D) and were generated by plasmid-based reverse genetics (50, 51).  
118 Mutations within the T1L S4, T1L M2, and T3D M2 genes were generated by  
119 QuikChange site-directed mutagenesis (Agilent Technologies). S344P in T1L  $\sigma 3$  was  
120 made using the following primer pair: forward 5'-  
121 CTGCTCTCACAAATGTTCCCGGACACCACCAAGTTCCGG-3' and reverse 5'-  
122 CCGAACTTGGTGGTGTCCGGGAACATTGTGAGAGCAG-3'. M258I in T1L  $\mu 1$  was  
123 made using the following primer pair: forward 5'-  
124 TCAGAAGGAACTGTGATTAATGAGGCCGTGAATGC-3' and reverse 5'-  
125 GCATTCACGGCCTCATTAAATCACAGTTCCTTCTGA-3'. M258I in T3D  $\mu 1$  was made  
126 using the following primer pair: forward 5'-  
127 ACGTATCAGAAGGCACCGTGATTAACGAGGCTGTC-3' and reverse 5'-  
128 GACAGCCTCGTTAATCACGGTGCCTTCTGATACGT-3'.

129  
130 **Virion purification.** Recombinant reoviruses T1L, T1L/T3D M2, T1L  $\mu 1$  M258I, T1L  $\sigma 3$   
131 S344P, T1L  $\mu 1$  M258I  $\sigma 3$  S344P, and T1L/T3D M2  $\mu 1$  M258I  $\sigma 3$  S344P were  
132 propagated and purified as previously described (50, 51). All variants in the T1L/T3D  
133 M2 background contained a T3D M2 gene in an otherwise T1L background. L cells  
134 infected with second passage reovirus stocks were lysed by sonication. Virions were  
135 extracted from lysates using Vertrel-XF specialty fluid (Dupont) (52). The extracted  
136 particles were layered onto 1.2- to 1.4-g/cm<sup>3</sup> CsCl step gradients. The gradients were  
137 then centrifuged at 187,000 $\times g$  for 4 h at 4°C. Bands corresponding to purified virions

138 (~1.36 g/cm<sup>3</sup>) (53) were isolated and dialyzed into virus storage buffer (10 mM Tris, pH  
139 7.4, 15 mM MgCl<sub>2</sub>, and 150 mM NaCl). Following dialysis, the particle concentration  
140 was determined by measuring the optical density of the purified virion stocks at 260 nm  
141 (OD<sub>260</sub>; 1 unit at OD<sub>260</sub> = 2.1×10<sup>12</sup> particles/ml) (54). The purification of virions was  
142 confirmed by SDS-PAGE and Coomassie brilliant blue (Sigma-Aldrich) staining.

143

144 **Selection and isolation of heat resistant (HR) strains.** T1L virions (2×10<sup>12</sup>  
145 particles/ml) were incubated for 5 min at 55°C in a S1000 thermal cycler (Bio-Rad). The  
146 total volume of the reaction was 30 µl in virus storage buffer (10 mM Tris, pH 7.4, 15  
147 mM MgCl<sub>2</sub>, and 150 mM NaCl). Following incubation, 10 µl were analyzed by plaque  
148 assay. Putative HR strains were plaque purified at 5 days post infection. Next, L cell  
149 monolayers in 60 mm dishes (Greiner Bio-One) were adsorbed with the isolated  
150 plaques for 1 h at 4°C. Following the viral attachment incubation, the monolayers were  
151 washed three times with ice-cold PBS and overlaid with 2 ml of Joklik's minimal  
152 essential medium (Lonza) supplemented with 5% fetal bovine serum (Life  
153 Technologies), 2 mM L-glutamine (Invitrogen), 100 U/ml penicillin (Invitrogen), 100  
154 µg/ml streptomycin (Invitrogen), and 25 ng/ml amphotericin B (Sigma-Aldrich). The  
155 cells were incubated at 37°C until cytopathic effect was observed and then lysed by two  
156 freeze-thaw cycles (first passage). To verify heat resistance, the infected cell lysates  
157 were incubated for 5 min at 55°C in a S1000 thermal cycler (Bio-Rad). The total volume  
158 of each reaction was 30 µl. For each isolate, an aliquot was also incubated for 5 min at  
159 4°C. Following incubation, 10 µl of each reaction were diluted into 40 µl of ice-cold virus  
160 storage buffer (10 mM Tris, pH 7.4, 15 mM MgCl<sub>2</sub>, and 150 mM NaCl) and infectivity

161 was determined by plaque assay. The change in infectivity was calculated using the  
162 following formula:  $\log_{10}(\text{PFU/ml})_{55^{\circ}\text{C}} - \log_{10}(\text{PFU/ml})_{4^{\circ}\text{C}}$ .

163

164 **Sequencing of HR strains.** L cell monolayers in 60 mm dishes (Greiner Bio-One)  
165 were adsorbed with first passage, verified HR strains for 1 h at 4°C. Following the viral  
166 attachment incubation, the monolayers were washed three times with ice-cold PBS and  
167 overlaid with 2 ml of Joklik's minimal essential medium (Lonza) supplemented with 5%  
168 fetal bovine serum (Life Technologies), 2 mM L-glutamine (Invitrogen), 100 U/ml  
169 penicillin (Invitrogen), 100 µg/ml streptomycin (Invitrogen), and 25 ng/ml amphotericin B  
170 (Sigma-Aldrich). At 24 h post infection, the cells were lysed with TRI Reagent  
171 (Molecular Research Center). Viral RNA was isolated by phenol-chloroform extraction  
172 and then subjected to reverse transcription (RT)-PCR using T1L S4 or T1L M2 gene  
173 segment-specific primers. PCR products were resolved on Tris-acetate-EDTA agarose  
174 gels, purified using a QIAquick gel extraction kit (Qiagen), and sequenced. The  
175 identified mutations were reintroduced into clean, T1L and T1L/T3D M2 backgrounds.

176

177 **Sequence analysis.** Multiple sequence alignments were created using the Clustal  
178 Omega program (55).

179

180 **Structure analysis.** Molecular graphics were created using the UCSF Chimera  
181 program (56).

182



183 **Generation of infectious subviral particles (ISVPs).** T1L, T1L/T3D M2, T1L  $\mu$ 1  
184 M258I, T1L  $\sigma$ 3 S344P, T1L  $\mu$ 1 M258I  $\sigma$ 3 S344P, or T1L/T3D M2  $\mu$ 1 M258I  $\sigma$ 3 S344P  
185 virions ( $2 \times 10^{12}$  particles/ml) were digested with 200  $\mu$ g/ml TLCK (*N* $\alpha$ -*p*-tosyl-L-lysine  
186 chloromethyl ketone)-treated chymotrypsin (Worthington Biochemical) in a total volume  
187 of 100  $\mu$ l for 20 min at 32°C (30, 31). The reactions were then incubated on ice for 20  
188 min and quenched by the addition of 1 mM phenylmethylsulfonyl fluoride (PMSF)  
189 (Sigma-Aldrich). The generation of ISVPs was confirmed by SDS-PAGE and  
190 Coomassie brilliant blue (Sigma-Aldrich) staining.

191  
192 **Dynamic light scattering.** T1L, T1L/T3D M2, T1L  $\mu$ 1 M258I, T1L  $\sigma$ 3 S344P, T1L  $\mu$ 1  
193 M258I  $\sigma$ 3 S344P, or T1L/T3D M2  $\mu$ 1 M258I  $\sigma$ 3 S344P virions or ISVPs ( $2 \times 10^{12}$   
194 particles/ml) were analyzed using a Zetasizer Nano S dynamic light scattering system  
195 (Malvern Instruments). All measurements were made at room temperature in a quartz  
196 Suprasil cuvette with a 3.00-mm-path length (Hellma Analytics). For each sample, the  
197 size distribution profile was determined by averaging readings across 15 iterations.

198  
199 **Thermal inactivation and trypsin sensitivity assays.** T1L, T1L/T3D M2, T1L  $\mu$ 1  
200 M258I, T1L  $\sigma$ 3 S344P, T1L  $\mu$ 1 M258I  $\sigma$ 3 S344P, or T1L/T3D M2  $\mu$ 1 M258I  $\sigma$ 3 S344P  
201 virions or ISVPs ( $2 \times 10^{12}$  particles/ml) were incubated for 5 min at the indicated  
202 temperatures in a S1000 thermal cycler (Bio-Rad). The total volume of each reaction  
203 was 30  $\mu$ l in virus storage buffer (10 mM Tris, pH 7.4, 15 mM MgCl<sub>2</sub>, and 150 mM  
204 NaCl). For each reaction condition, an aliquot was also incubated for 5 min at 4°C.  
205 Following incubation, 10  $\mu$ l of each reaction were diluted into 40  $\mu$ l of ice-cold virus

206 storage buffer (10 mM Tris, pH 7.4, 15 mM MgCl<sub>2</sub>, and 150 mM NaCl) and infectivity  
207 was determined by plaque assay. The change in infectivity at a given temperature ( $T$ )  
208 was calculated using the following formula:  $\log_{10}(\text{PFU/ml})_T - \log_{10}(\text{PFU/ml})_{4^\circ\text{C}}$ . The  
209 titers of the 4°C control samples were between  $5 \times 10^9$  and  $5 \times 10^{10}$  PFU/ml. The  
210 remaining 20  $\mu\text{l}$  of each reaction were either mock treated or treated with 0.08 mg/ml  
211 trypsin (Sigma-Aldrich) for 30 min on ice. Following digestion, equal particle numbers  
212 from each reaction were solubilized in reducing SDS sample buffer and analyzed by  
213 SDS-PAGE. The gels were Coomassie Brilliant Blue (Sigma-Aldrich) stained and  
214 imaged on an Odyssey imaging system (LI-COR).

215

216 **Degradation of  $\sigma 3$  by exogenous protease.** T1L, T1L/T3D M2, T1L  $\mu 1$  M258I, T1L  
217  $\sigma 3$  S344P, T1L  $\mu 1$  M258I  $\sigma 3$  S344P, or T1L/T3D M2  $\mu 1$  M258I  $\sigma 3$  S344P virions  
218 ( $2 \times 10^{12}$  particles/ml) were incubated in the presence of 10  $\mu\text{g/ml}$  endoproteinase LysC  
219 (New England Biolabs) at 37°C in a S1000 thermal cycler (Bio-Rad). The starting  
220 volume of each reaction was 100  $\mu\text{l}$  in virus storage buffer (10 mM Tris, pH 7.4, 15 mM  
221 MgCl<sub>2</sub>, and 150 mM NaCl). At the indicated time points, 10  $\mu\text{l}$  of each reaction was  
222 solubilized in reducing SDS sample buffer and boiled for 10 min at 95°C. Equal particle  
223 numbers from each time point were analyzed by SDS-PAGE. The gels were  
224 Coomassie Brilliant Blue (Sigma-Aldrich) stained and imaged on an Odyssey imaging  
225 system (LI-COR).

226

227 **Ammonium chloride (AC) escape assay.** L cell monolayers in 6-well plates (Greiner  
228 Bio-One) were adsorbed with T1L, T1L  $\mu 1$  M258I, T1L  $\sigma 3$  S344P, or T1L  $\mu 1$  M258I  $\sigma 3$

229 S344P virions (10 PFU/cell) for 1 h at 4°C. Following the viral attachment incubation,  
230 the monolayers were washed three times with ice-cold PBS and overlaid with 2 ml of  
231 Joklik's minimal essential medium (Lonza) supplemented with 5% fetal bovine serum  
232 (Life Technologies), 2 mM L-glutamine (Invitrogen), 100 U/ml penicillin (Invitrogen), 100  
233 µg/ml streptomycin (Invitrogen), and 25 ng/ml amphotericin B (Sigma-Aldrich). The  
234 cells were either lysed immediately by two freeze-thaw cycles (input) or incubated at  
235 37°C (start of infection). At the indicated times post infection, the growth medium was  
236 supplemented with 20 mM AC (Mallinckrodt Pharmaceuticals). At 24 h post infection,  
237 the cells were lysed by two freeze-thaw cycles and the virus titer was determined by  
238 plaque assay. The viral yield for each infection condition (timing of AC addition) ( $t$ ) was  
239 calculated using the following formula:  $\log_{10}(\text{PFU/ml})_t - \log_{10}(\text{PFU/ml})_{\text{input}}$ . The titers of  
240 the input samples were between  $1 \times 10^5$  and  $4 \times 10^5$  PFU/ml.

241  
242 **Single- and multistep growth assays.** L cell monolayers in 6-well plates (Greiner Bio-  
243 One) were adsorbed with T1L, T1L/T3D M2, T1L µ1 M258I, T1L σ3 S344P, T1L µ1  
244 M258I σ3 S344P, or T1L/T3D M2 µ1 M258I σ3 S344P virions (10 PFU/cell or 0.01  
245 PFU/cell) for 1 h at 4°C. Following the viral attachment incubation, the monolayers  
246 were washed three times with ice-cold PBS and overlaid with 2 ml of Joklik's minimal  
247 essential medium (Lonza) supplemented with 5% fetal bovine serum (Life  
248 Technologies), 2 mM L-glutamine (Invitrogen), 100 U/ml penicillin (Invitrogen), 100  
249 µg/ml streptomycin (Invitrogen), and 25 ng/ml amphotericin B (Sigma-Aldrich). The  
250 cells were either lysed immediately by two freeze-thaw cycles (input) or incubated at  
251 37°C (start of infection). At the indicated times post infection, the cells were lysed by

252 two freeze-thaw cycles and the virus titer was determined by plaque assay. The viral  
253 yield at a given time post infection ( $t$ ) was calculated using the following formula:  
254  $\log_{10}(\text{PFU/ml})_t - \log_{10}(\text{PFU/ml})_{\text{input}}$ . Following infection with 10 PFU/cell, the titers of the  
255 input samples were between  $1 \times 10^5$  and  $4 \times 10^5$  PFU/ml. Following infection with 0.01  
256 PFU/cell, the titers of the input samples were between  $1 \times 10^2$  and  $3 \times 10^2$  PFU/ml.

257

258 **Plaque assay.** Control or heat-treated virus samples or infected cell lysates were  
259 diluted in PBS supplemented with 2 mM  $\text{MgCl}_2$  ( $\text{PBS}^{\text{Mg}}$ ). L cell monolayers in 6-well  
260 plates (Greiner Bio-One) were infected with 250  $\mu\text{l}$  of diluted virus for 1 h at room  
261 temperature. Following the viral attachment incubation, the monolayers were overlaid  
262 with 4 ml of serum-free medium 199 (Sigma-Aldrich) supplemented with 1% Bacto Agar  
263 (BD Biosciences), 10  $\mu\text{g/ml}$  TLCK-treated chymotrypsin (Worthington Biochemical), 2  
264 mM L-glutamine (Invitrogen), 100 U/ml penicillin (Invitrogen), 100  $\mu\text{g/ml}$  streptomycin  
265 (Invitrogen), and 25 ng/ml amphotericin B (Sigma-Aldrich). The infected cells were  
266 incubated at  $37^\circ\text{C}$ , and plaques were counted at 5 days post infection.

267

268 **Statistical analysis.** Unless noted otherwise, the reported values represent the mean  
269 of three independent, biological replicates. Error bars indicate standard deviation.  $P$   
270 values were calculated using Student's  $t$  test (two-tailed, unequal variance assumed).  
271 For thermal inactivation experiments (Figs. 1A, 3A, and 5C), two criteria were used to  
272 assign significance:  $P \leq 0.05$  and difference in change in infectivity  $\geq 2 \log_{10}$  units. For  
273 single- and multistep growth experiments (Fig. 6), two criteria were used to assign  
274 significance:  $P \leq 0.05$  and difference in viral yield  $\geq 1 \log_{10}$  unit.

275

276

## 277 **RESULTS AND DISCUSSION**

278 **Characterization of putative heat resistant (HR) strains.** Reovirus is susceptible to  
279 environmental factors (42, 43). The loss of infectivity is correlated with outer capsid  
280 rearrangements (6, 35, 41). To isolate HR strains, type 1 Lang (T1L) virions were  
281 incubated at 55°C. The virus titer decreased by  $\sim 5.5 \log_{10}$  units compared to the input  
282 (data not shown). Survivors were plaque purified and used to generate infected cell  
283 lysates. Three plaque isolates (out of 5) exhibited a bona fide HR phenotype (Fig. 1A).  
284 Sequencing of the  $\mu 1$ - and  $\sigma 3$ -encoding gene segments (M2 and S4, respectively)  
285 revealed two mutations within each HR strain:  $\mu 1$  M258I (conserved position) and  $\sigma 3$   
286 S344P (nonconserved position) (Fig. 1B). These residues, which are not expected to  
287 interact, occupy distinct positions within the T1L  $\mu 1$ - $\sigma 3$  heterohexamer (Figs. 1C-D) (7).

288

289  **$\sigma 3$  S344P was sufficient to enhance capsid integrity.** Changes within other capsid  
290 components ( $\sigma 1$  and core proteins) could influence the HR phenotype. To address this  
291 concern, we reintroduced  $\mu 1$  M258I and  $\sigma 3$  S344P into clean T1L backgrounds.  
292 Variants with one or both mutations displayed no observable defects in protein  
293 composition or protein stoichiometry. Due to autocatalytic activity,  $\mu 1$  resolves as  $\mu 1C$ ,  
294 and  $\mu 1\delta$  resolves as  $\delta$  (Figs. 2A-B) (33). We also analyzed virions and ISVPs by  
295 dynamic light scattering (DLS). In each case, we detected a single peak with no  
296 evidence of aggregation (Fig. 2C).

297           The S4 gene segment (encodes for  $\sigma 3$ ) contains the genetic determinants for  
298 virion thermostability (43).  $\sigma 3$  preserves infectivity by stabilizing  $\mu 1$  (6). Any change  
299 that affects  $\mu 1$ - $\sigma 3$  structure could modulate this activity. To test this idea, we performed  
300 thermal inactivation experiments. Following incubation at 55°C, T1L and T1L  $\mu 1$  M258I  
301 virions were reduced in titer by  $\sim 5.5 \log_{10}$  units relative to control that was incubated at  
302 4°C. In contrast, T1L  $\sigma 3$  S344P and T1L  $\mu 1$  M258I  $\sigma 3$  S344P virions were reduced in  
303 titer by  $\sim 0.5 \log_{10}$  units after incubation at 55°C and by  $\sim 4.0 \log_{10}$  units after incubation  
304 at 58°C (Fig. 3A). Virion associated  $\mu 1$  adopts an ISVP\*-like (protease sensitive)  
305 conformation concurrent with inactivation. This transition is assayed *in vitro* by  
306 determining the susceptibility of  $\mu 1$  to trypsin digestion (6, 35, 41). Consistent with the  
307 above results, 55°C was the minimal temperature at which  $\mu 1$  in T1L and T1L  $\mu 1$  M258I  
308 virions became trypsin sensitive, whereas 58°C was the minimal temperature at which  
309  $\mu 1$  in T1L  $\sigma 3$  S344P and T1L  $\mu 1$  M258I  $\sigma 3$  S344P virions became trypsin sensitive (Fig.  
310 3B). Of note,  $\sigma 3$  was absent from gels and  $\mu 1$  migrated as uncleaved  $\mu 1C$  and cleaved  
311  $\delta$ . Trypsin, which was used to probe for protease sensitivity, degrades  $\sigma 3$  and cleaves  
312 at the  $\mu 1$   $\delta$ - $\Phi$  junction (29). Heating alone was not sufficient to alter  $\mu 1$  or  $\sigma 3$  levels  
313 (Fig. 3C).

314           The M2 gene segment (encodes for  $\mu 1$ ) contains the genetic determinants for  
315 ISVP thermostability. The transition to ISVP\* induces the loss of infectivity (35, 41).  
316 Following incubation at 51°C, T1L, T1L  $\mu 1$  M258I, T1L  $\sigma 3$  S344P, and T1L  $\mu 1$  M258I  $\sigma 3$   
317 S344P ISVPs were reduced in titer by  $\sim 5.0 \log_{10}$  units (Fig. 3D). Thus, HR mutations  
318 conferred stability only within the context of a virion ( $\sigma 3$  degradation restored wild-type-  
319 like heat sensitivity). Protease treatment also serves as a biochemical probe for ISVP\*

320 formation (35, 41). For each variant,  $\delta$  (a product of  $\mu$ 1 cleavage) (Fig. 2A) became  
321 trypsin sensitive at 51°C (Figs 3E). Heating alone was not sufficient to induce the loss  
322 of  $\delta$  (Fig. 3F).

323

324  **$\sigma$ 3 S344P was sufficient to reduce protease sensitivity.** Proteolytic disassembly  
325 (virion-to-ISVP conversion) is required for reovirus to establish an infection (27). T1L is  
326 more protease sensitive than T3D. This difference was mapped to polymorphisms at  
327 344, 347, and 353 using recombinant protein (57).  $\sigma$ 3 354 also regulates capsid  
328 properties (48, 49). These residues are thought to influence conformational flexibility  
329 through specific, intramonomer contacts (7, 57, 58). To determine if HR mutations alter  
330 disassembly kinetics, virions were digested *in vitro* with endoproteinase LysC (EKC).  
331 EKC probes for subtle differences in structure (57, 59). T1L and T1L  $\mu$ 1 M258I  $\sigma$ 3 were  
332 degraded within 40 min. In contrast, T1L  $\sigma$ 3 S344P and T1L  $\mu$ 1 M258I  $\sigma$ 3 S344P  $\sigma$ 3  
333 persisted (in part) for 100 min (Fig. 4A). We next tested the sensitivity to intracellular  
334 proteases. Cathepsin B-L require endosomal acidification for activity. As such,  
335 lysosomotropic weak bases (ammonium chloride [AC]) block infection (27, 60). Murine  
336 L929 (L) cells were adsorbed with virions, and viral yield was quantified at 24 h post  
337 infection. When indicated, the growth medium was supplemented with AC. The timing  
338 of AC escape is related to the rate of disassembly (27). Consistent with the above  
339 results, T1L and T1L  $\mu$ 1 M258I bypassed the block to infection with faster kinetics (viral  
340 yield of  $\sim 1.5 \log_{10}$  units when AC was added at 60 min) than T1L  $\sigma$ 3 S344P and T1L  $\mu$ 1  
341 M258I  $\sigma$ 3 S344P (viral yield of  $\sim 1.5 \log_{10}$  units when AC was added at 90 min) (Fig. 4B).  
342 These results provide evidence that HR mutations diminish conformational flexibility;

343 enhanced capsid integrity (Fig. 3) was correlated with reduced protease sensitivity (Fig.  
344 4).  $\sigma 3$  is initially cleaved in a hypersensitive region between 208-214 or 238-250 (57).  
345 Presumably,  $\sigma 3$  S344P influenced protease accessibility. This idea was previously  
346 suggested for  $\sigma 3$  Y354H (49). Of note, we did not observe a phenotype for  $\mu 1$  M258I.  
347 This change was identified within each HR strain; however, its function was not  
348 determined.

349

350 **HR mutations altered capsid properties in a reassortant background.** T1L $\times$ T3D  
351 reassortants are used extensively to study many aspects of the viral replication cycle  
352 (1). For example, T1L/T3D M2 contains mismatched subunits ( $\mu 1$ - $\sigma 3$  and  $\mu 1$ -core are  
353 derived from different strains). Virions with imperfect interactions retain wild-type-like  
354 stability and structure (6); however, HR mutations could function in a background  
355 dependent manner. To address this question, we generated T1L/T3D M2  $\mu 1$  M258I  $\sigma 3$   
356 S344P. This virus displayed no observable defects in protein composition, protein  
357 stoichiometry, or particle size distribution (Figs. 5A-B). We next tested the impact on  
358 capsid properties. Following incubation at 55°C, T1L/T3D M2 virions were reduced in  
359 titer by  $\sim 5.5 \log_{10}$  units, whereas T1L/T3D M2  $\mu 1$  M258I  $\sigma 3$  S344P virions were reduced  
360 in titer by  $\sim 1.0 \log_{10}$  unit. In contrast, ISVPs were equally thermostable (Fig. 5C). HR  
361 mutations also conferred differential sensitivity to EKC. T1L/T3D M2  $\sigma 3$  was degraded  
362 within 40 min, whereas T1L/T3D M2  $\mu 1$  M258I  $\sigma 3$  S344P  $\sigma 3$  persisted (in part) for 100  
363 min (Fig. 5D).

364



365 **HR mutations impaired replicative fitness in a reassortant background.** Reovirus  
366 disassembles efficiently during cell entry, yet remains stable in the environment. This  
367 balance is necessary for a productive infection and for spread to a new host (1, 61). HR  
368 mutations are favored at high temperatures (Figs. 3 and 5). We next examined their  
369 impact under physiological conditions. L cells were infected at high (10 PFU/cell) or low  
370 (0.01 PFU/cell) MOI, and viral yield was quantified at the indicated times post infection.  
371 Each T1L variant grew to similar levels (Fig. 6A). Thus, biochemical differences  
372 (described above) do not confer a selective advantage (or impediment) during a bona  
373 fide infection. In contrast, T1L/T3D M2  $\mu$ 1 M258I  $\sigma$ 3 S344P produced fewer infectious  
374 units than T1L/T3D M2 by 24 h post infection (high MOI) and by 48 and 72 h post  
375 infection (low MOI) (Fig. 6B). Interestingly, we attempted to isolate unique, HR strains  
376 in the reassortant background; however, each plaque isolate failed secondary screening  
377 (data not shown). The reduced viral yield and the absence (or low abundance) of  
378 resistant strains imply a replication defect.

379

380 **Implications for host-pathogen interactions.** The  $\sigma$ 3 protein influences cell entry  
381 (24-28), particle assembly (62-67), and environmental stability (43). Moreover,  
382 differences in the efficiency of translational shutdown map to the S4 gene segment  
383 (encodes for  $\sigma$ 3) (68). This effect may be direct or indirect by countering protein kinase  
384 R through  $\sigma$ 3-dsRNA interactions (69, 70).  $\sigma$ 3 function relies on its subcellular  
385 localization and its capacity to remain unbound from  $\mu$ 1; the affinity between  $\mu$ 1- $\sigma$ 3  
386 varies based on strain (71). Thus, HR mutations could impact these activities in a

387 reassortant background. Mechanistic studies are needed to dissect the relationship  
388 between the host and hyperstable reovirus.

389

390 **Conclusions.** Resistance-granting mutations are tools to understand structure-function  
391 relationships, the basis (or mechanism) of inactivation, and replicative fitness. Toward  
392 this end, we selected for rare subpopulations at high temperatures (Figs. 1-2). HR  
393 strains contained two mutations within  $\mu 1$ - $\sigma 3$ .  $\mu 1$  M258I was not associated with a  
394 phenotype, whereas  $\sigma 3$  S344P was sufficient to enhance capsid integrity and to reduce  
395 protease sensitivity (Figs. 3-4). Together, these changes impaired replicative fitness in  
396 a reassortant background (Fig. 6). This work reveals new details regarding the  
397 determinants of reovirus stability.

398

399

#### 400 **ACKNOWLEDGEMENTS**

401 We thank members of our laboratory and the Indiana University virology community for  
402 helpful suggestions. Dynamic light scattering was performed in the Indiana University  
403 Physical Biochemistry Instrumentation Facility.

404 Research reported in this publication was supported by the National Institute of  
405 Allergy and Infectious Diseases of the National Institutes of Health under award  
406 numbers 1R01AI110637 (to P.D.) and F32AI126643 (to A.J.S.) and by Indiana  
407 University. The content is solely the responsibility of the authors and does not  
408 necessarily represent the official views of the funders.

409

410

411 **REFERENCES**

- 412 1. **Dermody T, Parker J, Sherry B.** 2013. Orthoreoviruses, Fields virology, vol 2.  
413 Lippincott Williams & Wilkins.
- 414 2. **Zhang X, Ji Y, Zhang L, Harrison SC, Marinescu DC, Nibert ML, Baker TS.**  
415 2005. Features of reovirus outer capsid protein mu1 revealed by electron  
416 cryomicroscopy and image reconstruction of the virion at 7.0 Angstrom  
417 resolution. *Structure* **13**:1545-1557.
- 418 3. **Tao Y, Farsetta DL, Nibert ML, Harrison SC.** 2002. RNA synthesis in a cage--  
419 structural studies of reovirus polymerase lambda3. *Cell* **111**:733-745.
- 420 4. **Mertens P.** 2004. The dsRNA viruses. *Virus Res* **101**:3-13.
- 421 5. **Kumar CS, Dey D, Ghosh S, Banerjee M.** 2018. Breach: Host Membrane  
422 Penetration and Entry by Nonenveloped Viruses. *Trends Microbiol* **26**:525-537.
- 423 6. **Snyder AJ, Wang JC, Danthi P.** 2018. Components of the reovirus capsid  
424 differentially contribute to stability. *J Virol* doi:10.1128/JVI.01894-18.
- 425 7. **Liemann S, Chandran K, Baker TS, Nibert ML, Harrison SC.** 2002. Structure  
426 of the reovirus membrane-penetration protein, Mu1, in a complex with is  
427 protector protein, Sigma3. *Cell* **108**:283-295.
- 428 8. **Barton ES, Forrest JC, Connolly JL, Chappell JD, Liu Y, Schnell FJ, Nusrat**  
429 **A, Parkos CA, Dermody TS.** 2001. Junction adhesion molecule is a receptor  
430 for reovirus. *Cell* **104**:441-451.
- 431 9. **Campbell JA, Schelling P, Wetzel JD, Johnson EM, Forrest JC, Wilson GA,**  
432 **Aurrand-Lions M, Imhof BA, Stehle T, Dermody TS.** 2005. Junctional

- 433 adhesion molecule a serves as a receptor for prototype and field-isolate strains  
434 of mammalian reovirus. *J Virol* **79**:7967-7978.
- 435 10. **Konopka-Anstadt JL, Mainou BA, Sutherland DM, Sekine Y, Strittmatter**  
436 **SM, Dermody TS.** 2014. The Nogo receptor NgR1 mediates infection by  
437 mammalian reovirus. *Cell Host Microbe* **15**:681-691.
- 438 11. **Gentsch JR, Pacitti AF.** 1985. Effect of neuraminidase treatment of cells and  
439 effect of soluble glycoproteins on type 3 reovirus attachment to murine L cells. *J*  
440 *Virol* **56**:356-364.
- 441 12. **Paul RW, Choi AH, Lee PW.** 1989. The alpha-anomeric form of sialic acid is  
442 the minimal receptor determinant recognized by reovirus. *Virology* **172**:382-385.
- 443 13. **Reiss K, Stencel JE, Liu Y, Blaum BS, Reiter DM, Feizi T, Dermody TS,**  
444 **Stehle T.** 2012. The GM2 glycan serves as a functional coreceptor for serotype  
445 1 reovirus. *PLoS Pathog* **8**:e1003078.
- 446 14. **Reiter DM, Frierson JM, Halvorson EE, Kobayashi T, Dermody TS, Stehle**  
447 **T.** 2011. Crystal structure of reovirus attachment protein sigma1 in complex with  
448 sialylated oligosaccharides. *PLoS Pathog* **7**:e1002166.
- 449 15. **Borsa J, Morash BD, Sargent MD, Cops TP, Lievaart PA, Szekely JG.**  
450 1979. Two modes of entry of reovirus particles into L cells. *J Gen Virol* **45**:161-  
451 170.
- 452 16. **Ehrlich M, Boll W, Van Oijen A, Hariharan R, Chandran K, Nibert ML,**  
453 **Kirchhausen T.** 2004. Endocytosis by random initiation and stabilization of  
454 clathrin-coated pits. *Cell* **118**:591-605.

- 455 17. **Boulant S, Stanifer M, Kural C, Cureton DK, Massol R, Nibert ML,**  
456 **Kirchhausen T.** 2013. Similar uptake but different trafficking and escape routes  
457 of reovirus virions and infectious subvirion particles imaged in polarized Madin-  
458 Darby canine kidney cells. *Mol Biol Cell* **24**:1196-1207.
- 459 18. **Schulz WL, Haj AK, Schiff LA.** 2012. Reovirus uses multiple endocytic  
460 pathways for cell entry. *J Virol* **86**:12665-12675.
- 461 19. **Maginnis MS, Forrest JC, Kopecky-Bromberg SA, Dickeson SK, Santoro**  
462 **SA, Zutter MM, Nemerow GR, Bergelson JM, Dermody TS.** 2006. Beta1  
463 integrin mediates internalization of mammalian reovirus. *J Virol* **80**:2760-2770.
- 464 20. **Maginnis MS, Mainou BA, Derdowski A, Johnson EM, Zent R, Dermody TS.**  
465 2008. NPXY motifs in the beta1 integrin cytoplasmic tail are required for  
466 functional reovirus entry. *J Virol* **82**:3181-3191.
- 467 21. **Mainou BA, Dermody TS.** 2011. Src kinase mediates productive endocytic  
468 sorting of reovirus during cell entry. *J Virol* **85**:3203-3213.
- 469 22. **Mainou BA, Dermody TS.** 2012. Transport to late endosomes is required for  
470 efficient reovirus infection. *J Virol* **86**:8346-8358.
- 471 23. **Mainou BA, Zamora PF, Ashbrook AW, Dorset DC, Kim KS, Dermody TS.**  
472 2013. Reovirus cell entry requires functional microtubules. *MBio* **4**.
- 473 24. **Baer GS, Dermody TS.** 1997. Mutations in reovirus outer-capsid protein  
474 sigma3 selected during persistent infections of L cells confer resistance to  
475 protease inhibitor E64. *J Virol* **71**:4921-4928.

- 476 25. **Borsa J, Sargent MD, Lievaart PA, Copps TP.** 1981. Reovirus: evidence for a  
477 second step in the intracellular uncoating and transcriptase activation process.  
478 *Virology* **111**:191-200.
- 479 26. **Ebert DH, Deussing J, Peters C, Dermody TS.** 2002. Cathepsin L and  
480 cathepsin B mediate reovirus disassembly in murine fibroblast cells. *J Biol*  
481 *Chem* **277**:24609-24617.
- 482 27. **Sturzenbecker LJ, Nibert M, Furlong D, Fields BN.** 1987. Intracellular  
483 digestion of reovirus particles requires a low pH and is an essential step in the  
484 viral infectious cycle. *J Virol* **61**:2351-2361.
- 485 28. **Silverstein SC, Astell C, Levin DH, Schonberg M, Acs G.** 1972. The  
486 mechanisms of reovirus uncoating and gene activation in vivo. *Virology* **47**:797-  
487 806.
- 488 29. **Nibert ML, Fields BN.** 1992. A carboxy-terminal fragment of protein mu 1/mu  
489 1C is present in infectious subviral particles of mammalian reoviruses and is  
490 proposed to have a role in penetration. *J Virol* **66**:6408-6418.
- 491 30. **Borsa J, Copps TP, Sargent MD, Long DG, Chapman JD.** 1973. New  
492 intermediate subviral particles in the in vitro uncoating of reovirus virions by  
493 chymotrypsin. *J Virol* **11**:552-564.
- 494 31. **Joklik WK.** 1972. Studies on the effect of chymotrypsin on reovirions. *Virology*  
495 **49**:700-715.
- 496 32. **Zhang L, Chandran K, Nibert ML, Harrison SC.** 2006. Reovirus mu1  
497 structural rearrangements that mediate membrane penetration. *J Virol*  
498 **80**:12367-12376.

- 499 33. **Nibert ML, Odegard AL, Agosto MA, Chandran K, Schiff LA.** 2005. Putative  
500 autocleavage of reovirus mu1 protein in concert with outer-capsid disassembly  
501 and activation for membrane permeabilization. *J Mol Biol* **345**:461-474.
- 502 34. **Odegard AL, Chandran K, Zhang X, Parker JS, Baker TS, Nibert ML.** 2004.  
503 Putative autocleavage of outer capsid protein micro1, allowing release of  
504 myristoylated peptide micro1N during particle uncoating, is critical for cell entry  
505 by reovirus. *J Virol* **78**:8732-8745.
- 506 35. **Chandran K, Farsetta DL, Nibert ML.** 2002. Strategy for nonenveloped virus  
507 entry: a hydrophobic conformer of the reovirus membrane penetration protein  
508 micro 1 mediates membrane disruption. *J Virol* **76**:9920-9933.
- 509 36. **Agosto MA, Ivanovic T, Nibert ML.** 2006. Mammalian reovirus, a  
510 nonfusogenic nonenveloped virus, forms size-selective pores in a model  
511 membrane. *Proc Natl Acad Sci U S A* **103**:16496-16501.
- 512 37. **Ivanovic T, Agosto MA, Zhang L, Chandran K, Harrison SC, Nibert ML.**  
513 2008. Peptides released from reovirus outer capsid form membrane pores that  
514 recruit virus particles. *EMBO J* **27**:1289-1298.
- 515 38. **Nibert ML, Schiff LA, Fields BN.** 1991. Mammalian reoviruses contain a  
516 myristoylated structural protein. *J Virol* **65**:1960-1967.
- 517 39. **Snyder AJ, Danthi P.** 2018. Cleavage of the C-Terminal Fragment of Reovirus  
518 mu1 Is Required for Optimal Infectivity. *J Virol* **92**.
- 519 40. **Zhang L, Agosto MA, Ivanovic T, King DS, Nibert ML, Harrison SC.** 2009.  
520 Requirements for the formation of membrane pores by the reovirus  
521 myristoylated micro1N peptide. *J Virol* **83**:7004-7014.

- 522 41. **Middleton JK, Severson TF, Chandran K, Gillian AL, Yin J, Nibert ML.**  
523 2002. Thermostability of reovirus disassembly intermediates (ISVPs) correlates  
524 with genetic, biochemical, and thermodynamic properties of major surface  
525 protein mu1. *J Virol* **76**:1051-1061.
- 526 42. **Drayna D, Fields BN.** 1982. Biochemical studies on the mechanism of  
527 chemical and physical inactivation of reovirus. *J Gen Virol* **63 (Pt 1)**:161-170.
- 528 43. **Drayna D, Fields BN.** 1982. Genetic studies on the mechanism of chemical  
529 and physical inactivation of reovirus. *J Gen Virol* **63 (Pt 1)**:149-159.
- 530 44. **Agosto MA, Middleton JK, Freimont EC, Yin J, Nibert ML.** 2007.  
531 Thermolabilizing pseudoreversions in reovirus outer-capsid protein micro 1  
532 rescue the entry defect conferred by a thermostabilizing mutation. *J Virol*  
533 **81**:7400-7409.
- 534 45. **Hooper JW, Fields BN.** 1996. Role of the mu 1 protein in reovirus stability and  
535 capacity to cause chromium release from host cells. *J Virol* **70**:459-467.
- 536 46. **Middleton JK, Agosto MA, Severson TF, Yin J, Nibert ML.** 2007.  
537 Thermostabilizing mutations in reovirus outer-capsid protein mu1 selected by  
538 heat inactivation of infectious subviral particles. *Virology* **361**:412-425.
- 539 47. **Wessner DR, Fields BN.** 1993. Isolation and genetic characterization of  
540 ethanol-resistant reovirus mutants. *J Virol* **67**:2442-2447.
- 541 48. **Wetzel JD, Wilson GJ, Baer GS, Dunnigan LR, Wright JP, Tang DS,**  
542 **Dermody TS.** 1997. Reovirus variants selected during persistent infections of L  
543 cells contain mutations in the viral S1 and S4 genes and are altered in viral  
544 disassembly. *Journal of virology* **71**:1362-1369.



- 545 49. **Doyle JD, Danthi P, Kendall EA, Ooms LS, Wetzel JD, Dermody TS.** 2012.  
546 Molecular determinants of proteolytic disassembly of the reovirus outer capsid.  
547 J Biol Chem **287**:8029-8038.
- 548 50. **Berard A, Coombs KM.** 2009. Mammalian reoviruses: propagation,  
549 quantification, and storage. Curr Protoc Microbiol **Chapter 15**:Unit15C 11.
- 550 51. **Kobayashi T, Ooms LS, Ikizler M, Chappell JD, Dermody TS.** 2010. An  
551 improved reverse genetics system for mammalian orthoreoviruses. Virology  
552 **398**:194-200.
- 553 52. **Mendez, II, Hermann LL, Hazelton PR, Coombs KM.** 2000. A comparative  
554 analysis of freon substitutes in the purification of reovirus and calicivirus. J Virol  
555 Methods **90**:59-67.
- 556 53. **Smith RE, Zweerink HJ, Joklik WK.** 1969. Polypeptide components of virions,  
557 top component and cores of reovirus type 3. Virology **39**:791-810.
- 558 54. **Coombs KM.** 1998. Stoichiometry of reovirus structural proteins in virus, ISVP,  
559 and core particles. Virology **243**:218-228.
- 560 55. **Sievers F, Wilm A, Dineen D, Gibson TJ, Karplus K, Li W, Lopez R,**  
561 **McWilliam H, Remmert M, Soding J, Thompson JD, Higgins DG.** 2011.  
562 Fast, scalable generation of high-quality protein multiple sequence alignments  
563 using Clustal Omega. Mol Syst Biol **7**:539.
- 564 56. **Pettersen EF, Goddard TD, Huang CC, Couch GS, Greenblatt DM, Meng**  
565 **EC, Ferrin TE.** 2004. UCSF Chimera--a visualization system for exploratory  
566 research and analysis. J Comput Chem **25**:1605-1612.

- 567 57. **Jane-Valbuena J, Breun LA, Schiff LA, Nibert ML.** 2002. Sites and  
568 determinants of early cleavages in the proteolytic processing pathway of  
569 reovirus surface protein sigma3. *J Virol* **76**:5184-5197.
- 570 58. **Olland AM, Jane-Valbuena J, Schiff LA, Nibert ML, Harrison SC.** 2001.  
571 Structure of the reovirus outer capsid and dsRNA-binding protein sigma3 at 1.8  
572 Å resolution. *EMBO J* **20**:979-989.
- 573 59. **Jane-Valbuena J, Nibert ML, Spencer SM, Walker SB, Baker TS, Chen Y,**  
574 **Centonze VE, Schiff LA.** 1999. Reovirus virion-like particles obtained by  
575 recoating infectious subvirion particles with baculovirus-expressed sigma3  
576 protein: an approach for analyzing sigma3 functions during virus entry. *J Virol*  
577 **73**:2963-2973.
- 578 60. **Rawlings ND, Salvesen G.** 2013. Handbook of proteolytic enzymes, Third  
579 edition. / ed. Elsevier/AP, Amsterdam.
- 580 61. **Flint SJ, Racaniello VR, Rall GF, Skalka AM, Enquist LW.** 2015. Principles of  
581 virology, 4th edition. ed. ASM Press, Washington, DC.
- 582 62. **Antczak JB, Joklik WK.** 1992. Reovirus genome segment assortment into  
583 progeny genomes studied by the use of monoclonal antibodies directed against  
584 reovirus proteins. *Virology* **187**:760-776.
- 585 63. **Danis C, Garzon S, Lemay G.** 1992. Further characterization of the ts453  
586 mutant of mammalian orthoreovirus serotype 3 and nucleotide sequence of the  
587 mutated S4 gene. *Virology* **190**:494-498.

- 588 64. **Mabrouk T, Lemay G.** 1994. The sequence similarity of reovirus sigma 3  
589 protein to picornaviral proteases is unrelated to its role in mu 1 viral protein  
590 cleavage. *Virology* **202**:615-620.
- 591 65. **Morgan EM, Zweerink HJ.** 1974. Reovirus morphogenesis. Corelike particles  
592 in cells infected at 39 degrees with wild-type reovirus and temperature-sensitive  
593 mutants of groups B and G. *Virology* **59**:556-565.
- 594 66. **Roner MR, Lin PN, Nepluev I, Kong LJ, Joklik WK.** 1995. Identification of  
595 signals required for the insertion of heterologous genome segments into the  
596 reovirus genome. *Proc Natl Acad Sci U S A* **92**:12362-12366.
- 597 67. **Shing M, Coombs KM.** 1996. Assembly of the reovirus outer capsid requires  
598 mu 1/sigma 3 interactions which are prevented by misfolded sigma 3 protein in  
599 temperature-sensitive mutant tsG453. *Virus Res* **46**:19-29.
- 600 68. **Sharpe AH, Fields BN.** 1982. Reovirus inhibition of cellular RNA and protein  
601 synthesis: role of the S4 gene. *Virology* **122**:381-391.
- 602 69. **Denzler KL, Jacobs BL.** 1994. Site-directed mutagenic analysis of reovirus  
603 sigma 3 protein binding to dsRNA. *Virology* **204**:190-199.
- 604 70. **Yue Z, Shatkin AJ.** 1997. Double-stranded RNA-dependent protein kinase  
605 (PKR) is regulated by reovirus structural proteins. *Virology* **234**:364-371.
- 606 71. **Schmechel S, Chute M, Skinner P, Anderson R, Schiff L.** 1997. Preferential  
607 translation of reovirus mRNA by a sigma3-dependent mechanism. *Virology*  
608 **232**:62-73.
- 609  
610

611 **FIGURE LEGENDS**

612 **FIG 1** Selection, isolation, and sequencing of heat resistant strains. (A) Thermal  
613 inactivation. T1L virions were incubated for 5 min at 55°C. Surviving strains were  
614 plaque purified and amplified on L cells. To verify heat resistance, the infected cell  
615 lysates were incubated for 5 min at 55°C. The change in infectivity relative to samples  
616 incubated at 4°C was determined by plaque assay. The data are presented as means  $\pm$   
617 SDs. \*,  $P \leq 0.05$  and difference in change in infectivity  $\geq 2 \log_{10}$  units ( $n = 3$   
618 independent replicates). (B) Multiple sequence alignments. Residues corresponding to  
619  $\mu 1$  258 and  $\sigma 3$  344 are in boldface. (C) Side view of the T1L  $\mu 1$ - $\sigma 3$  heterohexamer (7)  
620 (Protein Data Bank [PDB] accession number 1JMU). (D) Top and bottom views (left  
621 and right, respectively) of the T1L  $\mu 1$ - $\sigma 3$  heterohexamer (7) (Protein Data Bank [PDB]  
622 accession number 1JMU). In panels C and D,  $\mu 1$  monomers are colored blue,  $\sigma 3$   
623 monomers are colored red,  $\mu 1$  258 is represented by magenta spheres, and  $\sigma 3$  344 is  
624 represented by green spheres.

625  
626 **FIG 2** Protein compositions and size distribution profiles of T1L variants. (A) Schematic  
627 of  $\mu 1$  cleavage fragments. (B) Protein compositions. T1L, T1L  $\mu 1$  M258I, T1L  $\sigma 3$   
628 S344P, and T1L  $\mu 1$  M258I  $\sigma 3$  S344P virions and ISVPs were analyzed by SDS-PAGE.  
629 The gel was Coomassie brilliant blue stained. The migration of capsid proteins is  
630 indicated on the left.  $\mu 1$  resolves as  $\mu 1C$ , and  $\mu 1\delta$  resolves as  $\delta$  (33).  $\mu 1N$  and  $\Phi$  are  
631 too small to resolve on the gel ( $n = 3$  independent replicates; results from 1  
632 representative experiment are shown). (C) Size distribution profiles. T1L, T1L  $\mu 1$   
633 M258I, T1L  $\sigma 3$  S344P, or T1L  $\mu 1$  M258I  $\sigma 3$  S344P virions or ISVPs were analyzed by

634 dynamic light scattering. For each variant, the virion (black) and ISVP (gray) size  
635 distribution profiles are overlaid ( $n = 3$  independent replicates; results from 1  
636 representative experiment are shown).

637

638 **FIG 3** Thermostability of T1L variants. (A and D) Thermal inactivation. T1L, T1L  $\mu$ 1  
639 M258I, T1L  $\sigma$ 3 S344P, or T1L  $\mu$ 1 M258I  $\sigma$ 3 S344P virions (A) or ISVPs (D) were  
640 incubated in virus storage for 5 min at the indicated temperatures. The change in  
641 infectivity relative to samples incubated at 4°C was determined by plaque assay. The  
642 data are presented as means  $\pm$  SDs. \*,  $P \leq 0.05$  and difference in change in infectivity  
643  $\geq 2 \log_{10}$  units ( $n = 3$  independent replicates). (B and E) Heat induced conformational  
644 changes. T1L, T1L  $\mu$ 1 M258I, T1L  $\sigma$ 3 S344P, or T1L  $\mu$ 1 M258I  $\sigma$ 3 S344P virions (B) or  
645 ISVPs (E) were incubated in virus storage buffer for 5 min at the indicated  
646 temperatures. Each reaction was then treated with trypsin for 30 min on ice. Following  
647 digestion, equal particle numbers from each reaction were analyzed by SDS-PAGE.  
648 The gels were Coomassie brilliant blue stained ( $n = 3$  independent replicates; results  
649 from 1 representative experiment are shown). (C and F). Composition of heated virus.  
650 T1L, T1L  $\mu$ 1 M258I, T1L  $\sigma$ 3 S344P, or T1L  $\mu$ 1 M258I  $\sigma$ 3 S344P virions (C) or ISVPs (F)  
651 were incubated in virus storage buffer for 5 min at the indicated temperatures. Equal  
652 particle numbers from each reaction were analyzed by SDS-PAGE. The gels were  
653 Coomassie brilliant blue stained ( $n = 3$  independent replicates; results from 1  
654 representative experiment are shown).

655

656 **FIG 4** Degradation of  $\sigma 3$  by exogenous and intracellular proteases. (A) Exogenous  
657 protease. T1L, T1L  $\mu 1$  M258I, T1L  $\sigma 3$  S344P, or T1L  $\mu 1$  M258I  $\sigma 3$  S344P virions were  
658 incubated in virus storage buffer supplemented with endoproteinase LysC for the  
659 indicated amounts of time at 37°C. Following digestion, equal particle numbers from  
660 each time point were analyzed by SDS-PAGE. The gels were Coomassie brilliant blue  
661 stained (n = 3 independent replicates; results from 1 representative experiment are  
662 shown). (B) Intracellular proteases. L cell monolayers were infected with T1L, T1L  $\mu 1$   
663 M258I, T1L  $\sigma 3$  S344P, or T1L  $\mu 1$  M258I  $\sigma 3$  S344P virions. At the indicated times post  
664 infection, the growth medium was supplemented with ammonium chloride. At 24 h post  
665 infection, the cells were lysed and viral yield was quantified by plaque assay. The data  
666 are presented as means  $\pm$  SDs (n = 3 independent replicates). AC, ammonium  
667 chloride; Unt, untreated.

668

669 **FIG 5** Thermostability of a T1L/T3D M2 variant. (A) Protein compositions. T1L/T3D M2  
670 and T1L/T3D M2  $\mu 1$  M258I  $\sigma 3$  S344P virions and ISVPs were analyzed by SDS-PAGE.  
671 The gel was Coomassie brilliant blue stained. The migration of capsid proteins is  
672 indicated on the left.  $\mu 1$  resolves as  $\mu 1C$ , and  $\mu 1\delta$  resolves as  $\delta$  (33).  $\mu 1N$  and  $\Phi$  are  
673 too small to resolve on the gel (n = 3 independent replicates; results from 1  
674 representative experiment are shown). (B) Size distribution profiles. T1L/T3D M2 or  
675 T1L/T3D M2  $\mu 1$  M258I  $\sigma 3$  S344P virions or ISVPs were analyzed by dynamic light  
676 scattering. For each variant, the virion (black) and ISVP (gray) size distribution profiles  
677 are overlaid (n = 3 independent replicates; results from 1 representative experiment are  
678 shown). (C) Thermal inactivation. T1L/T3D M2 or T1L/T3D M2  $\mu 1$  M258I  $\sigma 3$  S344P

679 virions or ISVPs were incubated in virus storage for 5 min at the indicated temperatures.  
680 The change in infectivity relative to samples incubated at 4°C was determined by plaque  
681 assay. The data are presented as means  $\pm$  SDs. \*,  $P \leq 0.05$  and difference in change  
682 in infectivity  $\geq 2 \log_{10}$  units ( $n = 3$  independent replicates). (D) Degradation of  $\sigma 3$  by  
683 exogenous protease. T1L/T3D M2 or T1L/T3D M2  $\mu 1$  M258I  $\sigma 3$  S344P virions were  
684 incubated in virus storage buffer supplemented with endoproteinase LysC for the  
685 indicated amounts of time at 37°C. Following digestion, equal particle numbers from  
686 each time point were analyzed by SDS-PAGE. The gels were Coomassie brilliant blue  
687 stained ( $n = 3$  independent replicates; results from 1 representative experiment are  
688 shown).

689

690 **FIG 6** Growth profiles of T1L and T1L/T3D M2 variants. (A and B) L cell monolayers  
691 were infected with virions at an MOI of 10 PFU/cell or 0.01 PFU/cell. At the indicated  
692 times post infection, the cells were lysed and viral yield was quantified by plaque assay.  
693 The data are presented as means  $\pm$  SDs. \*,  $P \leq 0.05$  and difference in viral yield  $\geq 1$   
694  $\log_{10}$  unit ( $n = 3$  independent replicates).

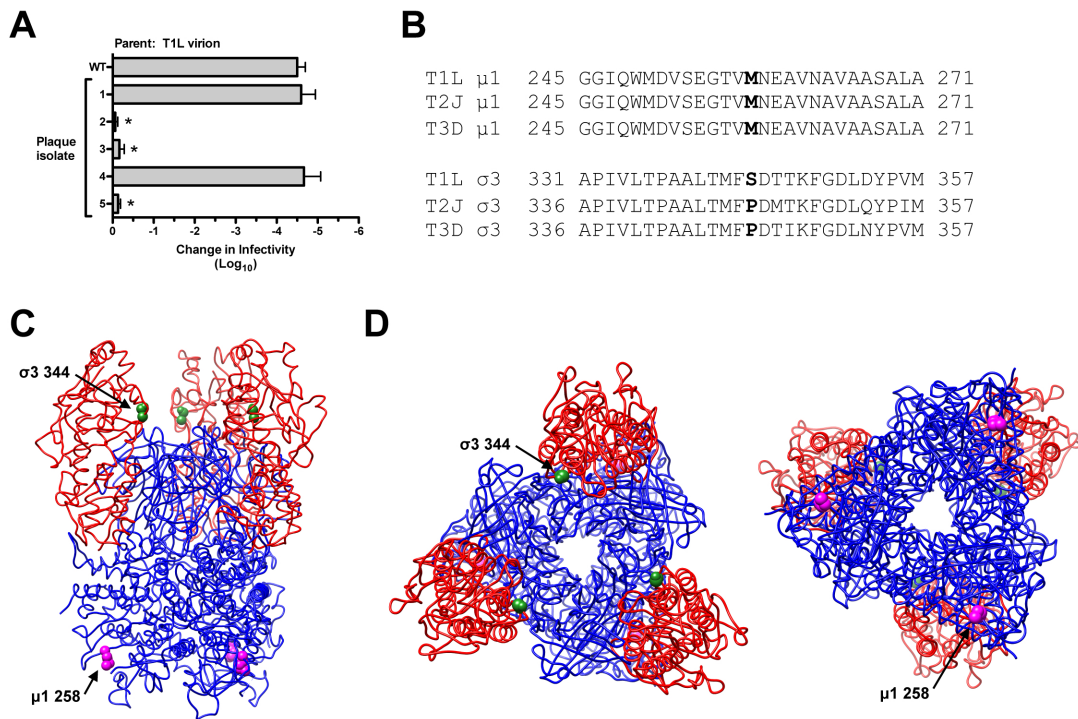

**FIG 1** Selection, isolation, and sequencing of heat resistant strains. (A) Thermal inactivation. T1L virions were incubated for 5 min at 55°C. Surviving strains were plaque purified and amplified on L cells. To verify heat resistance, the infected cell lysates were incubated for 5 min at 55°C. The change in infectivity relative to samples incubated at 4°C was determined by plaque assay. The data are presented as means  $\pm$  SDs. \*,  $P \leq 0.05$  and difference in change in infectivity  $\geq 2 \log_{10}$  units ( $n = 3$  independent replicates). (B) Multiple sequence alignments. Residues corresponding to  $\mu 1$  258 and  $\sigma 3$  344 are in boldface. (C) Side view of the T1L  $\mu 1$ - $\sigma 3$  heterohexamer (7) (Protein Data Bank [PDB] accession number 1JMU). (D) Top and bottom views (left and right, respectively) of the T1L  $\mu 1$ - $\sigma 3$  heterohexamer (7) (Protein Data Bank [PDB] accession number 1JMU). In panels C and D,  $\mu 1$  monomers are colored blue,  $\sigma 3$  monomers are colored red,  $\mu 1$  258 is represented by magenta spheres, and  $\sigma 3$  344 is represented by green spheres.



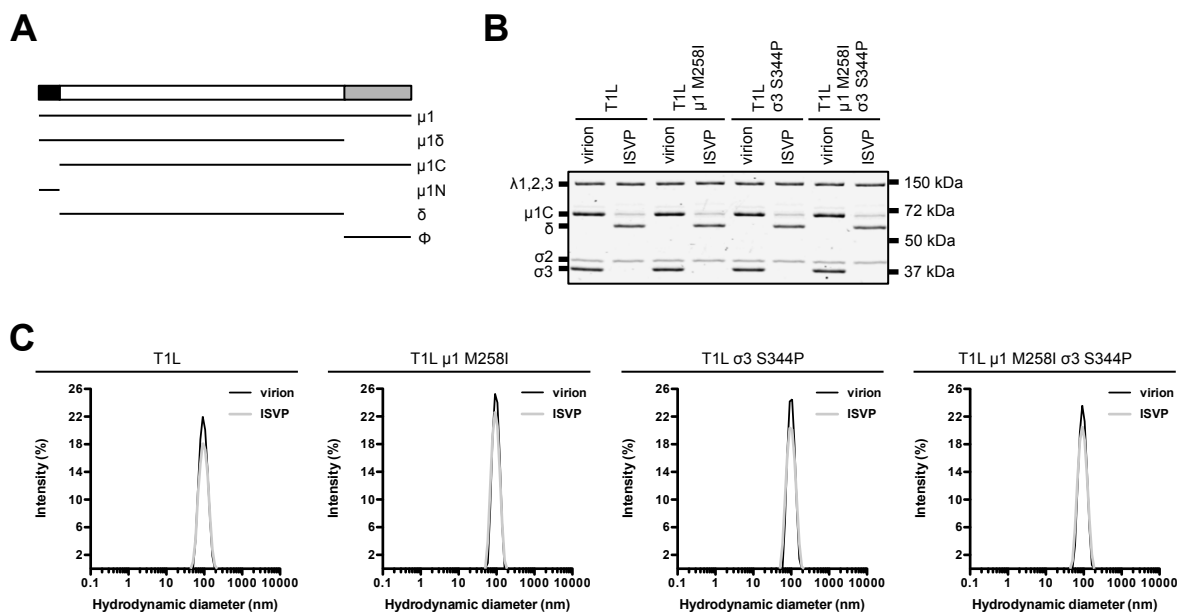

**FIG 2** Protein compositions and size distribution profiles of T1L variants. (A) Schematic of  $\mu$ 1 cleavage fragments. (B) Protein compositions. T1L, T1L  $\mu$ 1 M258I, T1L  $\sigma$ 3 S344P, and T1L  $\mu$ 1 M258I  $\sigma$ 3 S344P virions and ISVPs were analyzed by SDS-PAGE. The gel was Coomassie brilliant blue stained. The migration of capsid proteins is indicated on the left.  $\mu$ 1 resolves as  $\mu$ 1C, and  $\mu$ 1 $\delta$  resolves as  $\delta$  (33).  $\mu$ 1N and  $\Phi$  are too small to resolve on the gel ( $n = 3$  independent replicates; results from 1 representative experiment are shown). (C) Size distribution profiles. T1L, T1L  $\mu$ 1 M258I, T1L  $\sigma$ 3 S344P, or T1L  $\mu$ 1 M258I  $\sigma$ 3 S344P virions or ISVPs were analyzed by dynamic light scattering. For each variant, the virion (black) and ISVP (gray) size distribution profiles are overlaid ( $n = 3$  independent replicates; results from 1 representative experiment are shown).

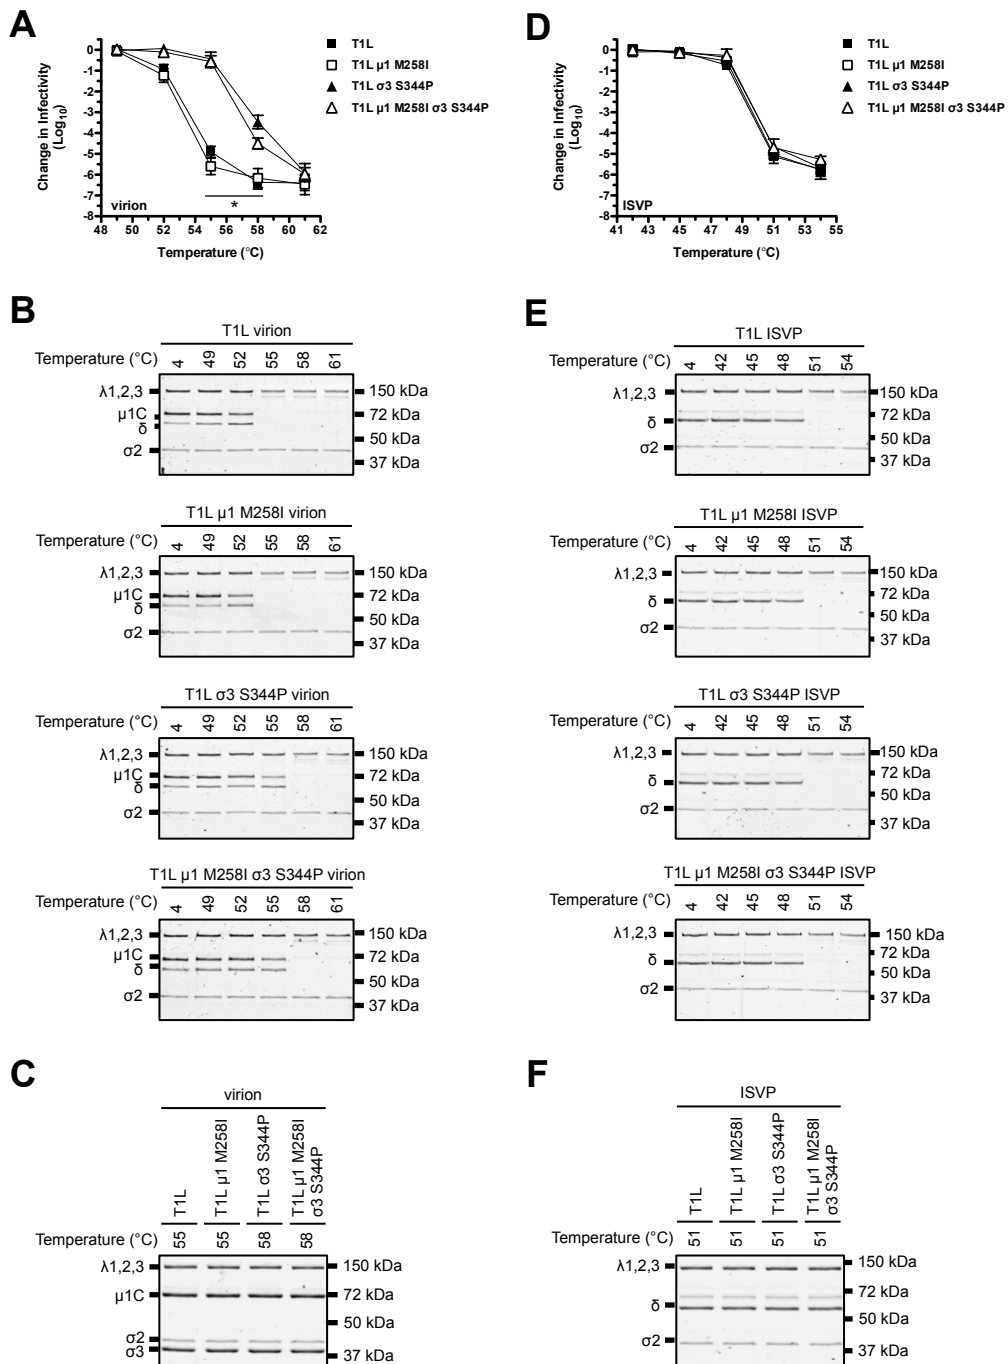

**FIG 3** Thermostability of T1L variants. (A and D) Thermal inactivation. T1L, T1L  $\mu$ 1 M258I, T1L  $\sigma$ 3 S344P, or T1L  $\mu$ 1 M258I  $\sigma$ 3 S344P virions (A) or ISVPs (D) were incubated in virus storage for 5 min at the indicated temperatures. The change in infectivity relative to samples incubated at  $4^{\circ}\text{C}$  was determined by plaque assay. The data are presented as means  $\pm$  SDs. \*,  $P \leq 0.05$  and difference in change in infectivity  $\geq 2 \log_{10}$  units ( $n = 3$  independent replicates). (B and E) Heat induced conformational changes. T1L, T1L  $\mu$ 1 M258I, T1L  $\sigma$ 3 S344P, or T1L  $\mu$ 1 M258I  $\sigma$ 3 S344P virions (B) or ISVPs (E) were incubated in virus storage buffer for 5 min at the indicated temperatures. Each reaction was then treated with trypsin for 30 min on ice. Following digestion, equal particle numbers from each reaction were analyzed by SDS-PAGE. The gels were Coomassie brilliant blue stained ( $n = 3$  independent replicates; results from 1 representative experiment are shown). (C and F). Composition of heated virus. T1L, T1L  $\mu$ 1 M258I, T1L  $\sigma$ 3 S344P, or T1L  $\mu$ 1 M258I  $\sigma$ 3 S344P virions (C) or ISVPs (F) were incubated in virus storage buffer for 5 min at the indicated temperatures. Equal particle numbers from each reaction were analyzed by SDS-PAGE. The gels were Coomassie brilliant blue stained ( $n = 3$  independent replicates; results from 1 representative experiment are shown).

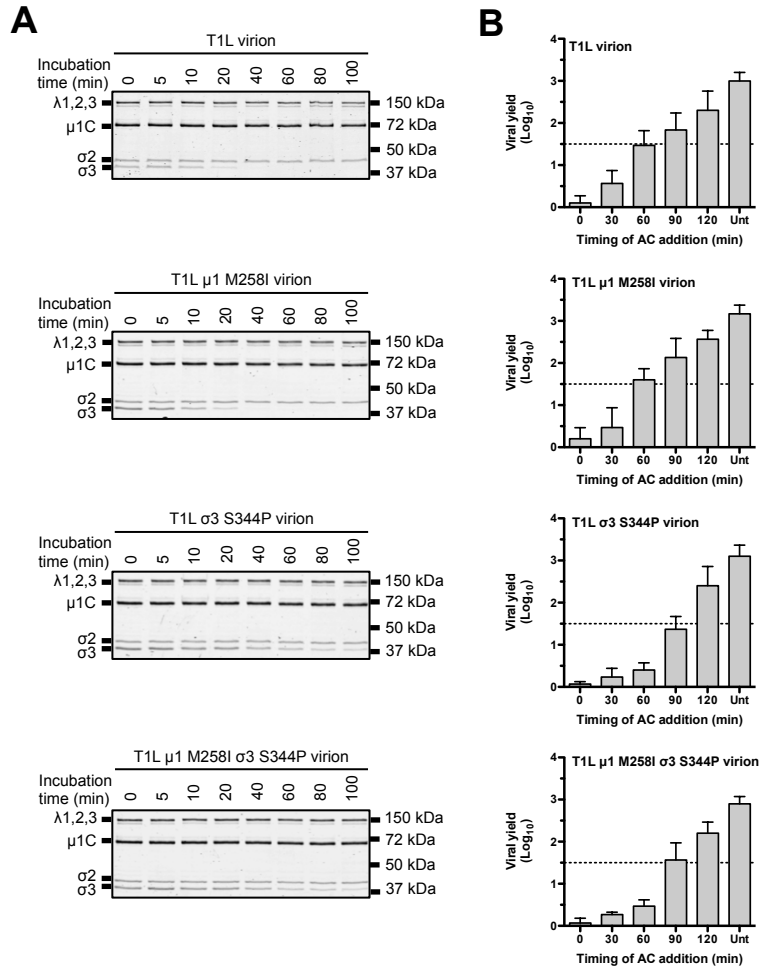

**FIG 4** Degradation of  $\sigma$ 3 by exogenous and intracellular proteases. (A) Exogenous protease. T1L, T1L  $\mu$ 1 M258I, T1L  $\sigma$ 3 S344P, or T1L  $\mu$ 1 M258I  $\sigma$ 3 S344P virions were incubated in virus storage buffer supplemented with endoproteinase LysC for the indicated amounts of time at 37°C. Following digestion, equal particle numbers from each time point were analyzed by SDS-PAGE. The gels were Coomassie brilliant blue stained ( $n = 3$  independent replicates; results from 1 representative experiment are shown). (B) Intracellular proteases. L cell monolayers were infected with T1L, T1L  $\mu$ 1 M258I, T1L  $\sigma$ 3 S344P, or T1L  $\mu$ 1 M258I  $\sigma$ 3 S344P virions. At the indicated times post infection, the growth medium was supplemented with ammonium chloride. At 24 h post infection, the cells were lysed and viral yield was quantified by plaque assay. The data are presented as means  $\pm$  SDs ( $n = 3$  independent replicates). AC, ammonium chloride; Unt, untreated.

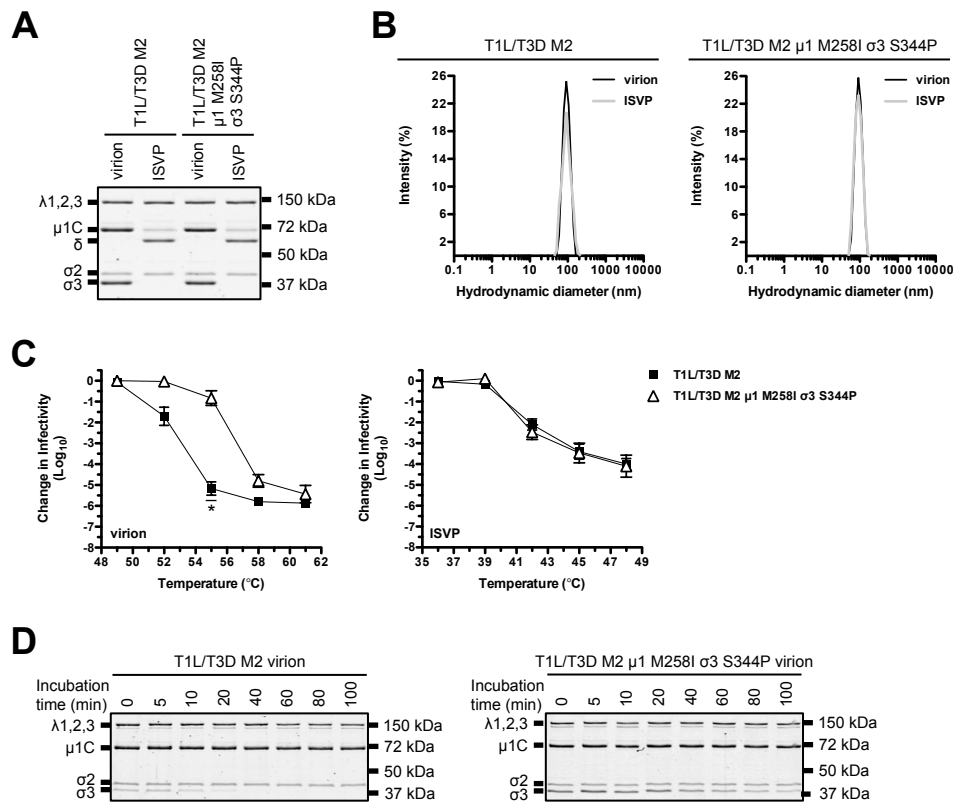

**FIG 5** Thermostability of a T1L/T3D M2 variant. (A) Protein compositions. T1L/T3D M2 and T1L/T3D M2 μ1 M258I σ3 S344P virions and ISVPs were analyzed by SDS-PAGE. The gel was Coomassie brilliant blue stained. The migration of capsid proteins is indicated on the left. μ1 resolves as μ1C, and μ1δ resolves as δ (33). μ1N and Φ are too small to resolve on the gel (n = 3 independent replicates; results from 1 representative experiment are shown). (B) Size distribution profiles. T1L/T3D M2 or T1L/T3D M2 μ1 M258I σ3 S344P virions or ISVPs were analyzed by dynamic light scattering. For each variant, the virion (black) and ISVP (gray) size distribution profiles are overlaid (n = 3 independent replicates; results from 1 representative experiment are shown). (C) Thermal inactivation. T1L/T3D M2 or T1L/T3D M2 μ1 M258I σ3 S344P virions or ISVPs were incubated in virus storage for 5 min at the indicated temperatures. The change in infectivity relative to samples incubated at 4°C was determined by plaque assay. The data are presented as means ± SDs. \*,  $P \leq 0.05$  and difference in change in infectivity  $\geq 2 \log_{10}$  units (n = 3 independent replicates). (D) Degradation of σ3 by exogenous protease. T1L/T3D M2 or T1L/T3D M2 μ1 M258I σ3 S344P virions were incubated in virus storage buffer supplemented with endoprotease LysC for the indicated amounts of time at 37°C. Following digestion, equal particle numbers from each time point were analyzed by SDS-PAGE. The gels were Coomassie brilliant blue stained (n = 3 independent replicates; results from 1 representative experiment are shown).

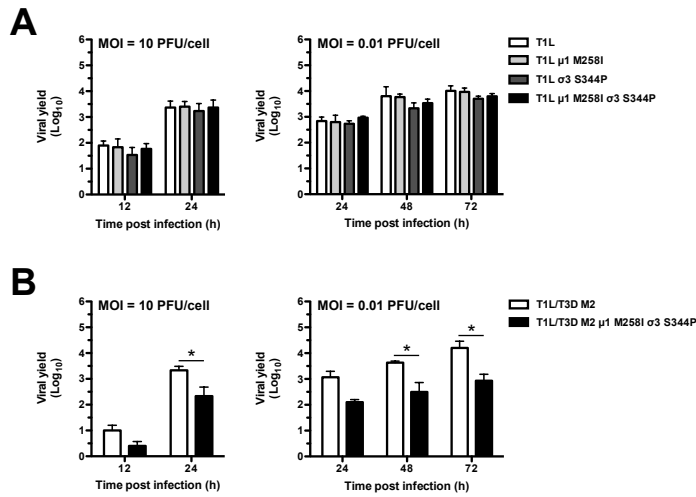

**FIG 6** Growth profiles of T1L and T1L/T3D M2 variants. (A and B) L cell monolayers were infected with virions at an MOI of 10 PFU/cell or 0.01 PFU/cell. At the indicated times post infection, the cells were lysed and viral yield was quantified by plaque assay. The data are presented as means  $\pm$  SDs. \*,  $P \leq 0.05$  and difference in viral yield  $\geq 1 \log_{10}$  unit ( $n = 3$  independent replicates).
